# Supplementary material
Source: Elsevier journal article supplement (https://www.sciencedirect.com/science/article/pii/S2444382422001237)
Supplement: mmc1 [file S2444382422001237:mmc1.pdf]

# EII-Control

## Cuestionario para el control de la enfermedad inflamatoria intestinal

### 1. ¿Usted considera que...

a. su EII ha estado bien controlada en las últimas dos semanas?

Sí

No

No estoy seguro

☐
☐
☐

b. su tratamiento actual es útil para controlar su EII?

Sí

No

No estoy seguro

☐
☐
☐

*Si no está tomando ningún tratamiento, marque esta casilla*

☐

2. Durante las últimas dos semanas, sus síntomas intestinales, ¿han mejorado, han empeorado o no han sufrido ningún cambio?

Mejor

Sin cambios

Peor

☐
☐
☐

### 3. En las últimas dos semanas, usted....

a. ha dejado de hacer alguna actividad planeada por culpa de su EII?  
(por ej. acudir al trabajo, asistir a sus clases, actos sociales...)

Sí

No

No estoy seguro

☐
☐
☐

b. se ha despertado por la noche por sus síntomas de EII?

Sí

No

No estoy seguro

☐
☐
☐

c. ha sufrido un dolor o malestar significativo?

Sí

No

No estoy seguro

☐
☐
☐

d. se ha sentido a menudo fatigado o sin fuerzas?  
(por a menudo, nos referimos a más de la mitad del tiempo)

Sí

No

No estoy seguro

☐
☐
☐

e. se ha sentido ansioso o deprimido como consecuencia de su EII?

Sí

No

No estoy seguro

☐
☐
☐

f. ha creído que necesitaba un cambio en su tratamiento?

Sí

No

No estoy seguro

☐
☐
☐

### 4. En su próxima visita al médico, ¿qué temas le gustaría tratar?

a. tipos de medicamentos alternativos para controlar la EII

Sí

No

No estoy seguro

☐
☐
☐

b. formas de ajustar su propio tratamiento

Sí

No

No estoy seguro

☐
☐
☐

c. efectos secundarios asociados con el uso de sus medicamentos

Sí

No

No estoy seguro

☐
☐
☐

d. nuevos síntomas que han aparecido desde su última visita

Sí

No

No estoy seguro

☐
☐
☐

### 5. Finalmente, ¿cómo valoraría usted el control global de su EII durante las últimas dos semanas?

Utilice la siguiente escala de 0 (peor control posible) a 100 (mejor control posible) señalando con una línea vertical en la puntuación que corresponda

Peor  
control  
posible

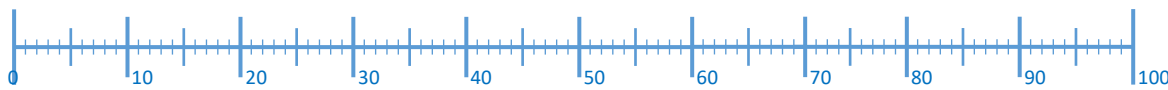

Mejor  
control  
posible
